# Supplementary material
Source: PubMed Central journal article supplement (PMC1472515)
Supplement: pnas_0600494103_5.pdf [file pnas_0600494103_5.pdf]

**Table 2. Hematopoietic and non-hematopoietic cell lines retain the mechanism of monoallelic expression of 13q14.3 genes**

| Name    | <i>RFP2</i> |          | <i>RFP2OS</i> |     | <i>BCMSUN/DLeu2</i> |     | <i>BCMS</i>  |             |             |               |            |            |
|---------|-------------|----------|---------------|-----|---------------------|-----|--------------|-------------|-------------|---------------|------------|------------|
|         | Geno-type   | RNA      | Geno-type     | RNA | Geno-type           | RNA | Geno-type e1 | RNA e1_2_17 | RNA e1_2_28 | Geno-type e40 | RNA e28_40 | RNA e29_40 |
| 22RV1   | C           | C        | G             | G   | T                   | T   | T            |             |             | <b>TC</b>     | <b>C</b>   |            |
| HeLa    | C           |          | G             |     | T                   |     | T            |             |             | <b>TC</b>     | <b>T</b>   | TC         |
| HL-60   | C           |          | G             |     | TG                  | TG  | <b>AT</b>    | <b>A</b>    |             | T             |            |            |
| JURKAT* | <b>GC</b>   | <b>C</b> | GC            | GC  | TG                  | TG  | <b>AT</b>    | <b>A</b>    | <b>A</b>    | <b>TC</b>     | <b>C</b>   | <b>C</b>   |
| JVM-2   | C           |          | G             |     | TG                  | TG  | <b>AT</b>    |             | <b>T</b>    | <b>TC</b>     | <b>T</b>   | TC         |
| LNCAP   | GC          | GC       | GC            | GC  |                     |     | T            |             |             |               |            |            |
| MOLT-4* | C           |          | G             |     |                     | G   | T            |             |             | <b>TC</b>     | <b>C</b>   | <b>C</b>   |
| RAJI    | C           |          | G             |     | TG                  | TG  | T            |             |             | T             |            |            |

Monoallelic expression is depicted in bold letters. The following cell lines were analyzed but not informative: EHEB, GRANTA, HDF, K-562, MEC-1, MEC-2, NALM, NAMALWA, and U-937.

\* JURKAT and MOLT-4 are tetraploid.
