# Supplementary material
Source: PubMed Central journal article supplement (PMC1472515)
Supplement: pnas_0600494103_6.pdf [file pnas_0600494103_6.pdf]

**Table 3. PCR primers**

|              | DNA                             |                             |                                       |                             |
|--------------|---------------------------------|-----------------------------|---------------------------------------|-----------------------------|
|              | First round                     |                             | Nesting                               |                             |
|              | Forward                         | Reverse                     | Forward                               | Reverse                     |
| KPNA3        | 470_ggcctttacaattcttcatttacc    | 471_ttcagactttctcctcctgaatg |                                       |                             |
| RFP2         | 639_ggagccgcgagtcatt            | 640_tctggaccacagacactg      | 641_ggctgtgcttggcgcgtac               | 642_gccggactggagctcagac     |
| BCMSe1       | 612_gcctccacagctgtcaatac        | 613_ggctcaggtgaatcgtacag    | 610_tggtgcagggtctccctttg              | 611_tgcgataaccctgtaaaagc    |
| BCMSe40      | 607_tcttggtacatagacaaacattagttc | 609_atcgtttcccacatgcaaag    | 607_tcttggtacatagacaaacattagttc       | 608_acctggtcgtgcaacagt      |
| BCMSUN/DLeu2 | 635_tgacataccaaatagtagctaccagct | 636_tggtgtcccataattgagaaagc | 618_ttattaagtgataatcttcagtagctaaacagt | 636_tggtgtcccataattgagaaagc |

  

|              | RNA                             |                                |                                       |                              |
|--------------|---------------------------------|--------------------------------|---------------------------------------|------------------------------|
|              | First round                     |                                | Nesting                               |                              |
|              | Forward                         | Reverse                        | Forward                               | Reverse                      |
| KPNA3        | 534_tgcagtctaatgcagtacctc       | 537_cacaagaaaggcacaactc        |                                       |                              |
| RFP2         | 504_tcgagataagtaccgcc           | 519_ctaaactcctcatctgttcaga     | 504_tcgagataagtaccgcc                 | 520_ccgtggatcatcaaacagactaca |
| RFP2AS       | 661_ccaccctcgtgaaggttc          | 662_aagtttgagatcagtagaagaatttc | 661_ccaccctcgtgaaggttc                | 663_ggaaggatgtagctgtgtatgca  |
| BCMSe1e17    | 655_tggtgcagggtctccctttg        | 659_tgctgtcgcctggaggccaatc     | 515_aggtgaagtgaacttagagttgt           | 4_tatgaaaactgtgcaagggttc     |
| BCMSe1e28    | 655_tggtgcagggtctccctttg        | 656_cccagtgtagtccaccatc        | 657_aggtgaagtgaacttagagttgt           | 10_cagtccagattaaccccactctc   |
| BCMSe28e40   | 664_ggtttaacttgactgaattggag     | 417_tcgtgcaacagtgtagacatgtg    | 543_ctgaattggaggaaaggaactgg           | 576_ccatgagacttctgcagcattc   |
| BCMSe29e40   | 544_tgctctggtatatacaataaaaagtg  | 417_tcgtgcaacagtgtagacatgtg    | 545_gtgcaagtagtagcatccttgc            | 576_ccatgagacttctgcagcattc   |
| BCMSUN/DLeu2 | 635_tgacataccaaatagtagctaccagct | 636_tggtgtcccataattgagaaagc    | 618_ttattaagtgataatcttcagtagctaaacagt | 636_tggtgtcccataattgagaaagc  |
