# Supplementary material
Source: PubMed Central journal article supplement (PMC1472515)

JURKAT

JVM-2

untreated

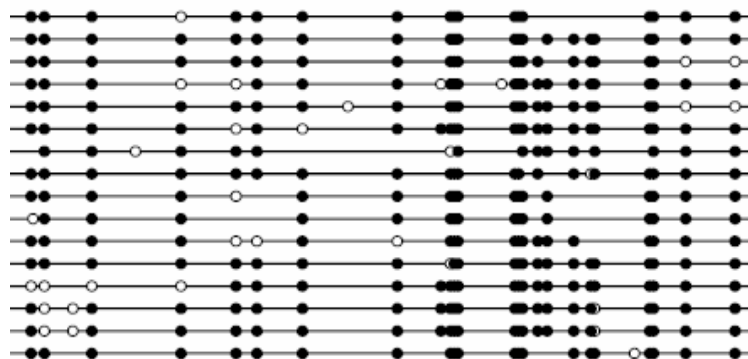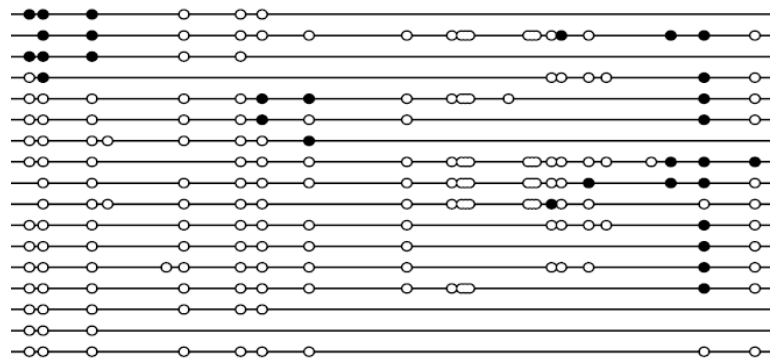

treated  
with  
5-CdR

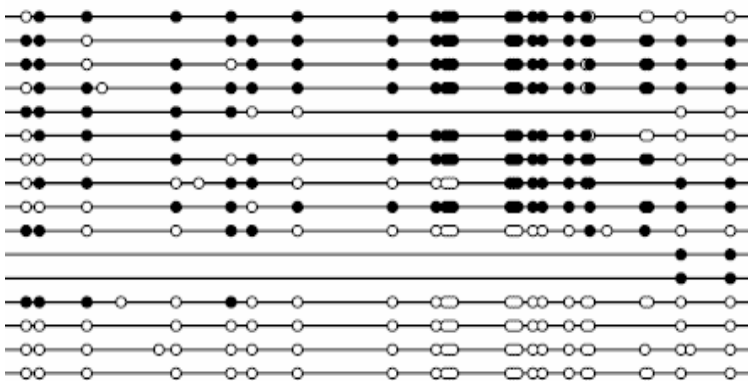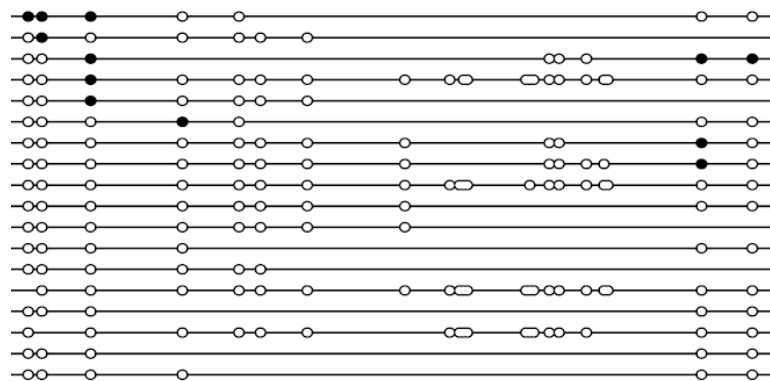

Supplement: pnas_0600494103_1.pdf [file pnas_0600494103_1.pdf]

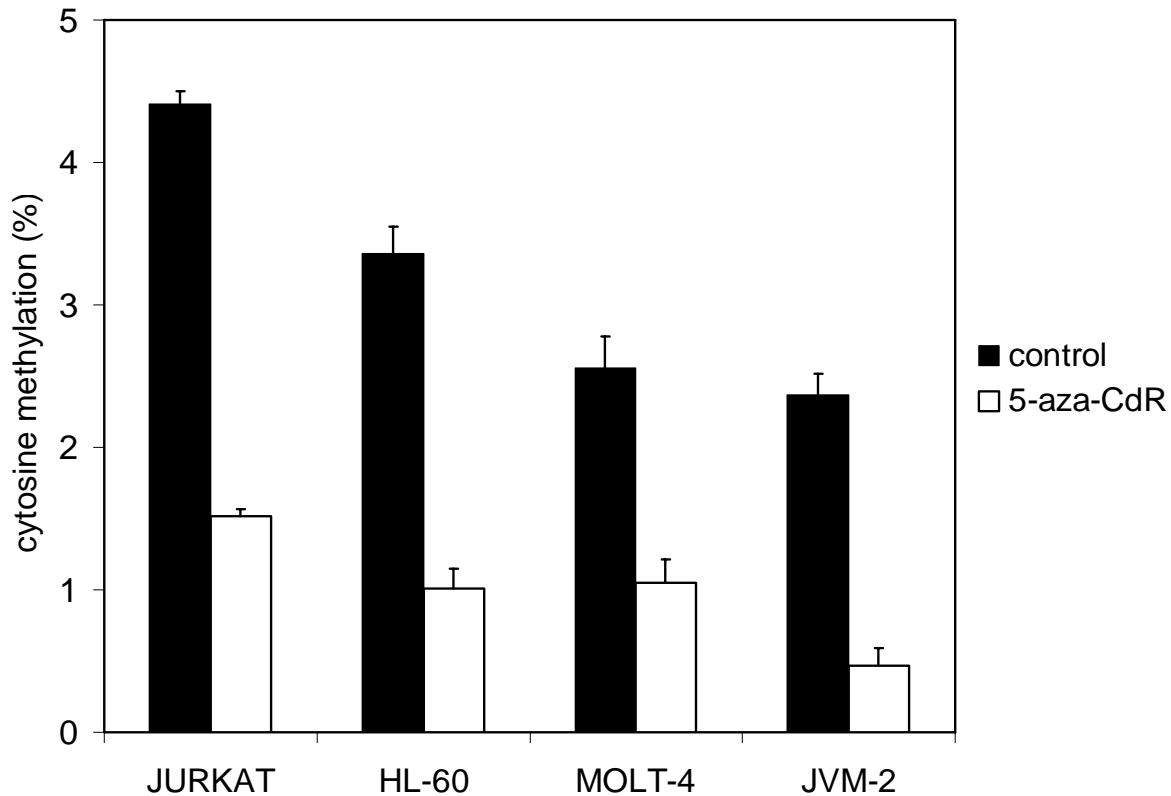

Supplement: pnas_0600494103_2.pdf [file pnas_0600494103_2.pdf]

A

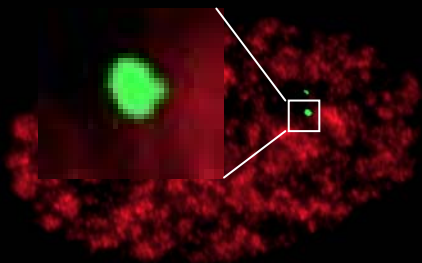

B

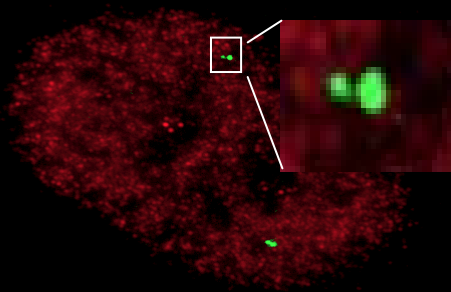

C

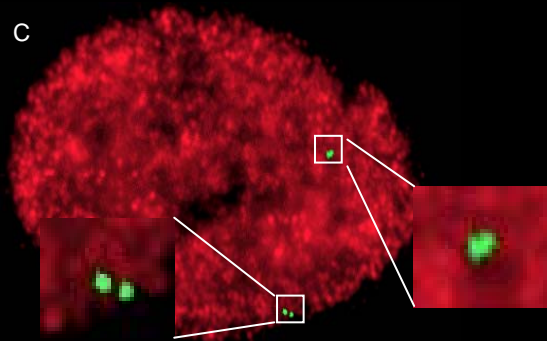

Supplement: pnas_0600494103_3.pdf [file pnas_0600494103_3.pdf]

DNA  
A B

DLeu2  
SNP rs  
2740544

BCMS  
SNP rs  
2066575

RFP2/OS  
SNP rs  
49785043

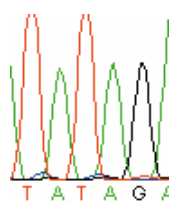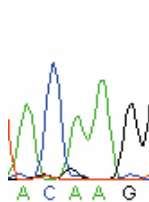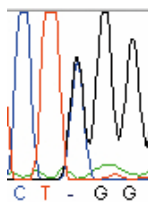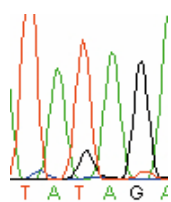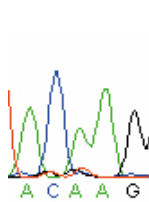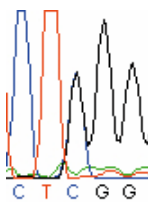

15% : 85%

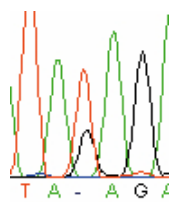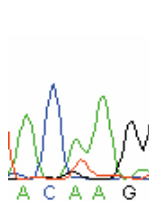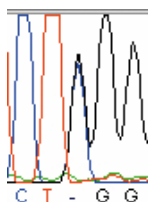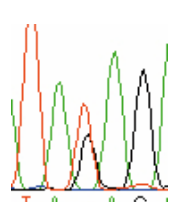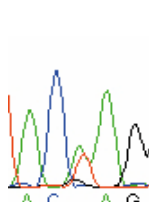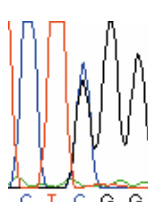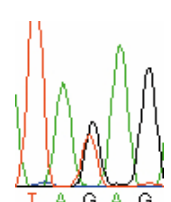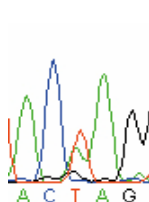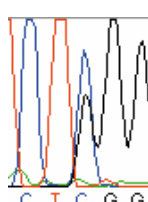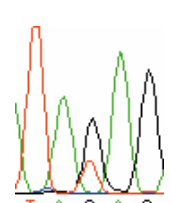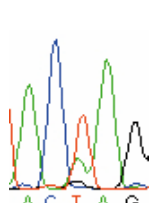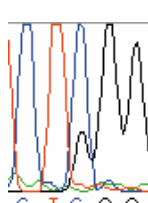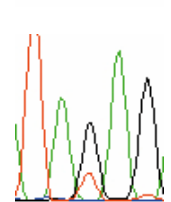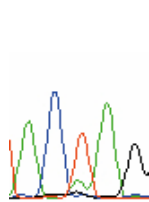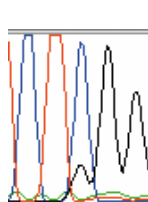

85% : 15%

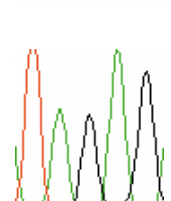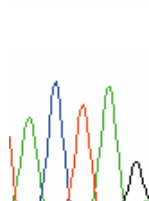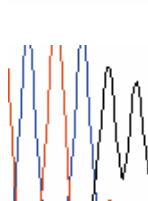

Supplement: pnas_0600494103_4.pdf [file pnas_0600494103_4.pdf]
